# Supplementary material for: Toll-like Receptor-Mediated Immunomodulation of Th1-Type Response Stimulated by Recombinant Antigen of Type 2 Porcine Reproductive and Respiratory Syndrome Virus (PRRSV-2)
Source: MDPI journal article supplement (doi:10.3390/v15030775), 2023-03-17
Supplement: s1 [file s1]

Supplementary Materials

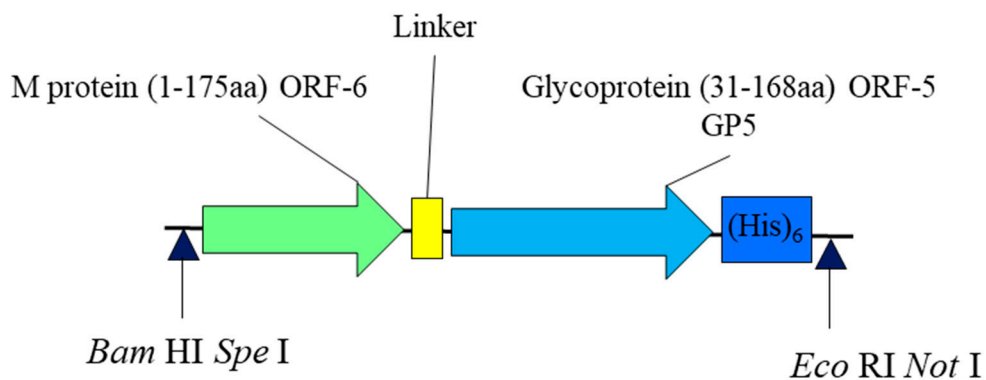

**Figure S1. Production of recombinant ORF6L5 (A3) protein.** Schematic representation of the ORF6L5 (A3) transfer vector construct. The coding sequence of the PRRSV-2 genes were cloned into baculovirus transfer plasmid between enzyme restriction sites to form the transfer vector. This transfer vector was co-transfected into Hi-5 insect cells along with the baculovirus to form recombinant baculovirus containing PRRSV-2 antigen.

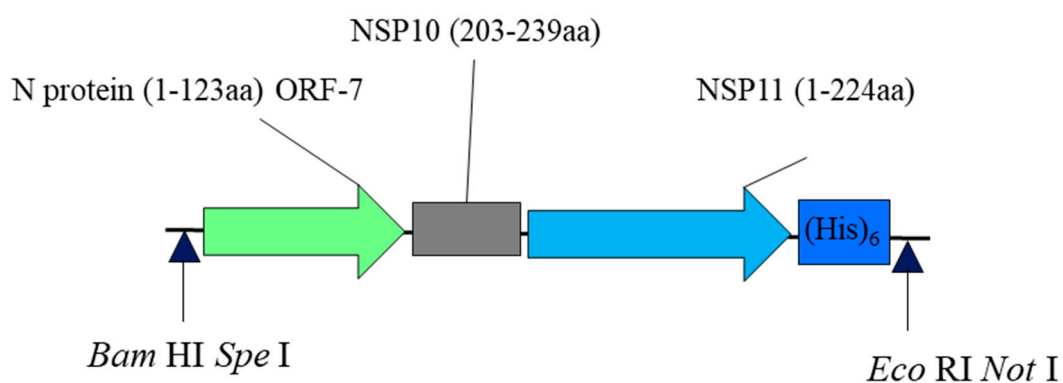

**Figure S2. Production of recombinant NLNsp10L11 (A4) protein.** Schematic representation of the NLNsp10L11 (A4) transfer vector construct. The coding sequence of the PRRSV-2 genes were cloned into baculovirus transfer plasmid between enzyme restriction sites to form the transfer vector. This transfer vector was co-transfected into Hi-5 insect cells along with the baculovirus to form recombinant baculovirus containing PRRSV-2 antigen.

**Tabel S1.** Primer Sequences for real-time quantitative PCR.

| Gene name             | GenBank Accesion Number | Primer sequences (5'-3')     | Length (bp) | Annealing Temp (°C) |
|-----------------------|-------------------------|------------------------------|-------------|---------------------|
| Porcine <i>IL-6</i>   | NM_001252429.1          | F: GCTGCTTCTGGTGATGGCTACTGCC | 318         | 67.78               |
|                       |                         | R: TGAAACTCCACAAGACCGGTGGTGA |             | 66.09               |
| Porcine <i>TNF-α</i>  | NM_214022.1             | F: ATGAGCACTGAGAGCATGATCCG   | 163         | 62.66               |
|                       |                         | R: CCTCGAAGTGCAGTAGGCAGA     |             | 61.83               |
| Porcine <i>Arg-1</i>  | XM_021082747.1          | F: TGATGTTGACGGACTGGACC      | 130         | 59.68               |
|                       |                         | R: ATCTAATCCTGAGAGTAGCCCTGT  |             | 60.14               |
| Porcine <i>IL-12</i>  | NM_213993.1             | F: TCAGAAAGGCCAAACAAACCCT    | 134         | 60.06               |
|                       |                         | R: GGCAACTCTCATTCGTGGCTA     |             | 60.41               |
| Porcine <i>PPAR-γ</i> | XM_005669788.3          | F: TTCTCCAGCATTTCCACTCC      | 190         | 57.50               |
|                       |                         | R: AGTTGGAAGGCTCTTCGTGA      |             | 58.95               |
| Porcine <i>IL-1β</i>  | NM_001302388.2          | F: TCTGCCCTGTACCCCAACTG      | 65          | 61.49               |
|                       |                         | R: CCCAGGAAGACGGGCTTT        |             | 59.24               |
| Porcine <i>IL-10</i>  | NM_214041.1             | F: GAACAGCTGCATCCACTTC       | 150         | 52.63               |
|                       |                         | R: TAACCCTTAAAGTCCTCCAGC     |             | 47.62               |
| Porcine <i>CD163</i>  | XM_021091123.1          | F: ATTCATCATCCTCGGACCCAT     | 110         | 58.66               |
|                       |                         | R: CCCAGCACAACGACCACCT       |             | 62.48               |
| Porcine <i>NF-κB</i>  | NM_001048232.1          | F: TCGCTGCCAAAGAAGGACAT      | 101         | 59.96               |
|                       |                         | R: AGCGTTCAGACCTTCACCGT      |             | 61.75               |

|                                         |                |                                     |     |       |
|-----------------------------------------|----------------|-------------------------------------|-----|-------|
| <b>Porcine TLR3</b>                     | NM_001097444.1 | <b>F:</b> TGGCCTCTCTCTGAACAATG      | 139 | 57.22 |
|                                         |                | <b>R:</b> TCCAAAGAAAGTCGTGTTGC      |     | 56.87 |
| <b>Porcine TLR4</b>                     | NM_001293316.1 | <b>F:</b> CAGATAAGCGAGGCCGTCATT     | 113 | 60.54 |
|                                         |                | <b>R:</b> TTGCAGCCCACAAAAAGCA       |     | 59.10 |
| <b>Porcine TLR7</b>                     | NM_001097434.1 | <b>F:</b> GGGAAAGCTCCAGTATCTGC      | 101 | 58.04 |
|                                         |                | <b>R:</b> TGACGCTTCTGGAACAGTTG      |     | 58.42 |
| <b>Porcine TLR8</b>                     | XM_013985896.2 | <b>F:</b> AAAAAGCACGTCCCTGAAAGAA    | 78  | 58.98 |
|                                         |                | <b>R:</b> TACCTGTCATCTTGGGCATT      |     | 56.50 |
| <b>Porcine TLR9</b>                     | XM_005669564.3 | <b>F:</b> GCCATTACTAGGGAGGTGGA      | 111 | 58.20 |
|                                         |                | <b>R:</b> CTTGCAGTTTGGCATGAAGT      |     | 57.19 |
| <b>Porcine PI3K</b>                     | XM_021086552.1 | <b>F:</b> GTGACTGACTGTGTAAGCCCA     | 168 | 59.93 |
|                                         |                | <b>R:</b> GACTGGCACCTAGAACGTGA      |     | 59.40 |
| <b>Porcine PKC<math>\delta</math></b>   | XM_021068966.1 | <b>F:</b> GCAGGGATTAAAGTGTGAAG      | 151 | 54.29 |
|                                         |                | <b>R:</b> AACCTCCGACTCTGACTTTC      |     | 56.89 |
| <b>Porcine PKD-1</b>                    | XM_021085680.1 | <b>F:</b> ACAGTCCCGCCGTCCAG         | 77  | 61.42 |
|                                         |                | <b>R:</b> CACAGCCGAGAAGCCGATC       |     | 60.88 |
| <b>Porcine BCL-3</b>                    | NM_001315716.1 | <b>F:</b> CGACGCGGTGGACATTAAG       | 72  | 59.00 |
|                                         |                | <b>R:</b> ACCATGCTAAGGCTGTTGTTTC    |     | 59.00 |
| <b>Porcine p65/RELA</b>                 | NM_001114281.1 | <b>F:</b> GGAACACGATGGCCACTTG       | 96  | 59.12 |
|                                         |                | <b>R:</b> AAGAGGACATCGAGGTGTATTTCAC |     | 60.62 |
| <b>Porcine NFATC1</b>                   | NM_214161.1    | <b>F:</b> ATCTCAGCTGTTGGGTCAGC      | 809 | 60.04 |
|                                         |                | <b>R:</b> AGTGAGGGTGAGTGGTCCAG      |     | 60.00 |
| <b>Porcine <math>\beta</math>-actin</b> | XM_021086047.1 | <b>F:</b> GGATGCAGAAGGAGATCACG      | 130 | 58.14 |
|                                         |                | <b>R:</b> ATCTGCTGGAAGGTGGACAG      |     | 59.38 |
